# Supplementary material
Source: PubMed Central journal article supplement (PMC9474791)

Fig.S-1. B-mode ultrasonography of the two siblings with POI.

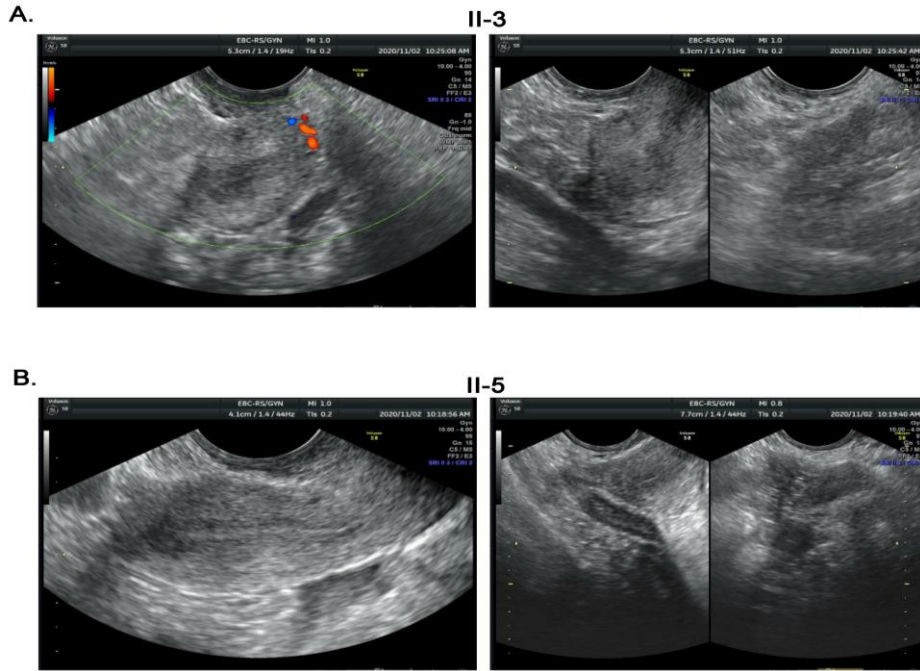

**Figure S-2** Detection of the transfection efficiency. The empty vector, flag tagged BMP15<sup>WT</sup>, BMP15<sup>791G>A</sup> and BMP15<sup>1076C>T</sup> plasmids were cotransfected with a GFP vector for 24 h. **A.** Green fluorescence was detected to evaluate the transfection efficiency. Scale bar=50  $\mu$ m. **B.** The percentage of GFP positive cells were measured by ImageJ. Statistical significance was determined with one-way ANOVA. Error bars =mean  $\pm$  SD, n=3. ns, not statistically significant. **C.** GFP protein levels were detected by WB.

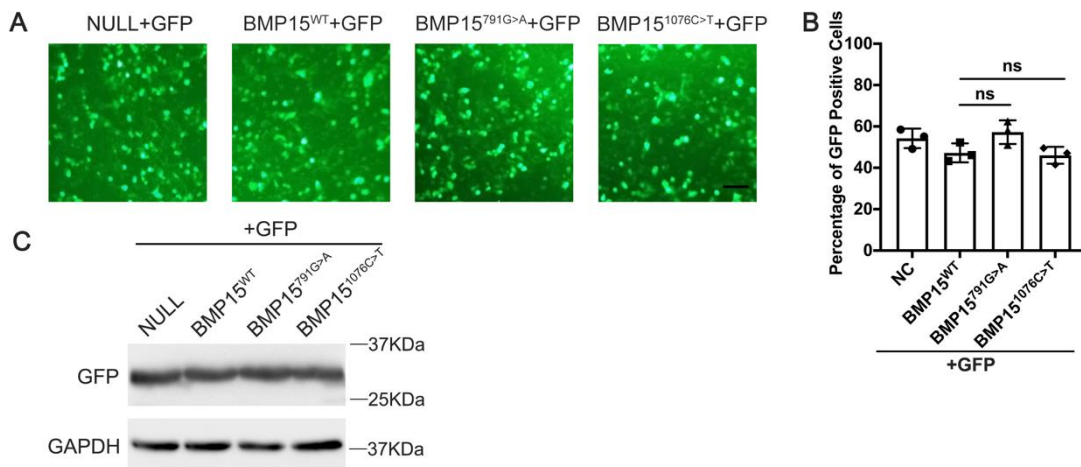

Supplement: 10815_2022_2574_MOESM1_ESM.pdf [file 10815_2022_2574_MOESM1_ESM.pdf]
